# Supplementary figures and images for: The SAGA complex regulates early steps in transcription via its deubiquitylase module subunit USP22
Source: PubMed Central journal article supplement — EMBO J. 2021 Jun 22;40(16):e102509. doi: 10.15252/embj.2019102509 (PMC8365265; doi:10.15252/embj.2019102509), 2021-06-22

**Figure 5 Source Data**

Fig 5H

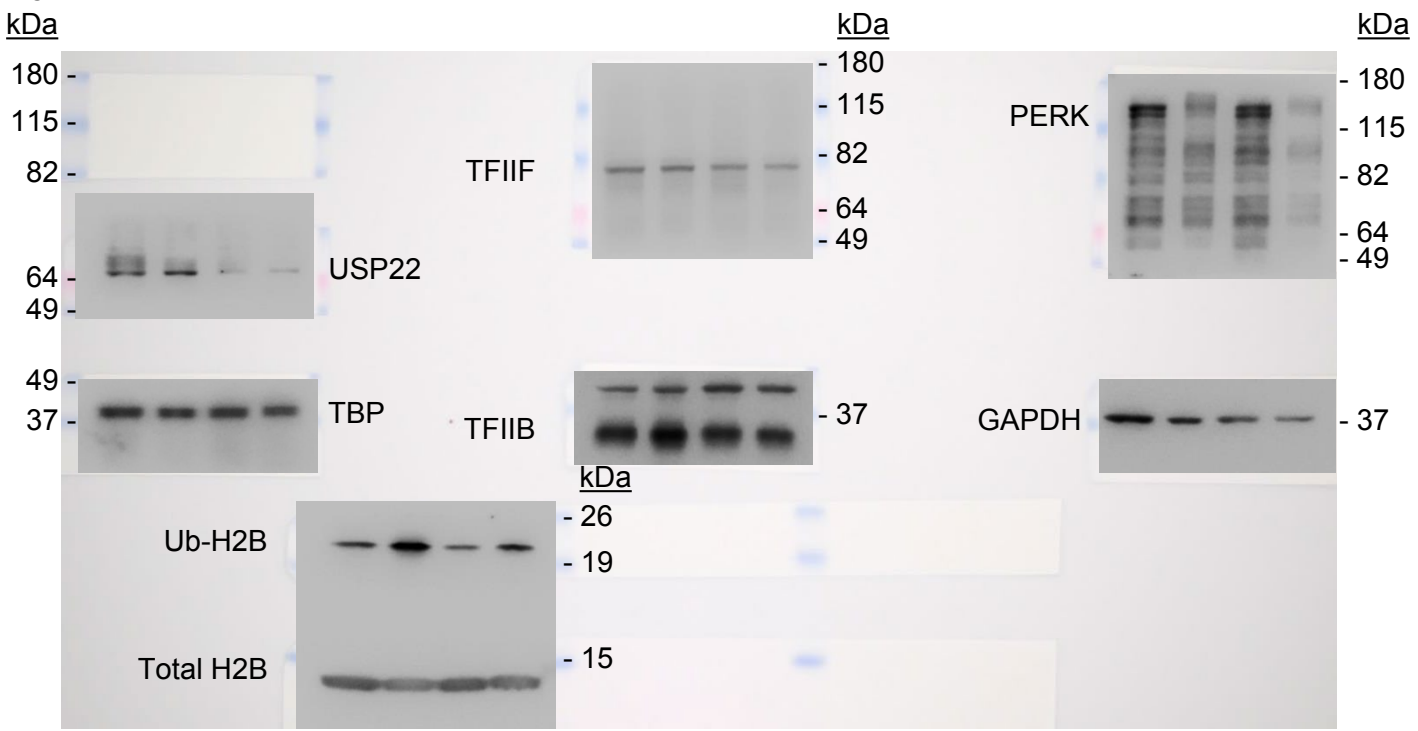

Supplement: EMBJ-40-e102509-s009.pdf [file EMBJ-40-e102509-s009.pdf]
